# Supplementary material for: The control of seed oil polyunsaturate content in the polyploid crop species Brassica napus
Source: PubMed Central journal article supplement (PMC3901927; doi:10.1007/s11032-013-9954-5), 2013-09-21
Supplement: 11032_2013_9954_MOESM1_ESM.pdf [file 11032_2013_9954_MOESM1_ESM.pdf]

**The control of seed oil polyunsaturate content in the polyploid crop species *Brassica napus***

Molecular Breeding

Rachel Wells, Martin Trick, Eleni Sompourou, Leah Clissold, Colin Morgan, Peter Werner, Carl Gibbard, Matthew Clarke, Richard Jennaway, and Ian Bancroft

Corresponding Author:

Prof. Ian Bancroft  
CNAP/M1  
Department of Biology,  
University of York,  
Wentworth Way,  
Heslington,  
York  
YO10 5DD

Telephone: +44 (0) 1904 328778

E-Mail: [ian.bancroft@york.ac.uk](mailto:ian.bancroft@york.ac.uk)

Skype: [prof.ian.bancroft](https://www.skype.com/profile/prof.ian.bancroft)

| Primer No. | Sequence (5'-3')         | Length (bp) | GC % | Tm   |
|------------|--------------------------|-------------|------|------|
| 1          | GTCTCCTCCCTCCAAAAAGT     | 20          | 50.0 | 54.9 |
| 2          | GTGTCTCCTCCCTCCAAA       | 18          | 55.6 | 51.9 |
| 3          | CTACAGAAACAAACATGGGC     | 20          | 45.0 | 53.1 |
| 4          | CTCTCCTCCCTCCAGCTCCC     | 20          | 70.0 | 62.4 |
| 5          | CTCTTCGACATCCTCCTCTC     | 20          | 55.0 | 53.3 |
| 6          | CCTCGTCCCTTACTTCTCCTG    | 21          | 57.1 | 58.2 |
| 7          | CCTCATAACTTATTGTTGTACCAG | 24          | 37.5 | 53.9 |
| 8          | CAAGACGACCAGAGACAGC      | 20          | 55.3 | 55.0 |
| 9          | GAACTCGACAAATTTGCCTG     | 20          | 55.7 | 45.0 |

Supplemental Table 1. Primers used for the amplification of *BnaFAD2*.

| Homologue          | F primer | R primer | Amplicon size (bp) | Notes                                                                                               |
|--------------------|----------|----------|--------------------|-----------------------------------------------------------------------------------------------------|
| <i>BnaC.FAD2.a</i> | 1        | 8        | 1212               |                                                                                                     |
| <i>BnaA.FAD2.a</i> | 2        | 7        | 1133               |                                                                                                     |
| <i>BnaC.FAD2.b</i> | 5        | 7        | 991                | Will not amplify in Cabriolet                                                                       |
| <i>BnaA.FAD2.b</i> | 6        | 9        | 966                |                                                                                                     |
| <i>BnaA.FAD2.b</i> | 3        | 7        | 1173               | <i>BnaA.FAD2.a</i> -specific in Cabriolet. Will also amplify <i>BnaC.FAD2.a</i> in other genotypes. |
| <i>BnaA.FAD2.b</i> | 4        | 7        | 1133               | <i>BnaA.FAD2.a</i> -specific in Cabriolet. Will also amplify <i>BnaC.FAD2.a</i> in other genotypes. |

Supplemental Table 2. Primer combinations required for the homologue specific amplification of *BnaFAD2*.

| Treatment | Total sown | Establishment % | No. grown on | % plants with >20seed | Fertile plants % |
|-----------|------------|-----------------|--------------|-----------------------|------------------|
| 0         | 1000       | 86.0            | 42           | 73.2                  | 97.6             |
| 0.2       | 6000       | 77.0            | 42           | 88.1                  | 100.0            |
| 0.4       | 6000       | 76.9            | 4130         | 91.6                  | 90.2             |
| 0.6       | 6000       | 73.5            | 4352         | 92.0                  | 98.7             |
| 0.8       | 6000       | 60.7            | 1148         | 93.7                  | 100.0            |
| 1         | 6000       | 70.0            | 42           | 63.3                  | 71.4             |
| 2         | 1000       | 0.0             | 0            | N/A                   | N/A              |
| 0         | 1000       | 86.0            | 42           | 73.2                  | 97.6             |

Supplemental Table 3. Emergence, fertility and seed number of *B. napus* Cabriolet seeds subjected to EMS treatment.

| Line | EMS % | Mutation | Status | Position relative to first coding base | Amino acid number | Amino acid | Amino acid classification | New amino acid | New amino acid classification |           |
|------|-------|----------|--------|----------------------------------------|-------------------|------------|---------------------------|----------------|-------------------------------|-----------|
| S    | 713   | 0.6      | C>CT   | HET                                    | 224               | 75         | Pro                       | Non-polar      | Leu                           | Non-polar |
| M    | 77    | 0.4      | C>CT   | HET                                    | 228               | 76         | Leu                       | Silent         |                               |           |
| S    | 595   | 0.6      | C>CT   | HET                                    | 228               | 76         | Leu                       | Silent         |                               |           |
| K    | 28    | 0.8      | C>CT   | HET                                    | 239               | 80         | Pro                       | Non-polar      | Leu                           | Non-polar |
| M    | 529   | 0.6      | C>T    | HOM                                    | 241               | 81         | Leu                       | Non-polar      | Phe                           | Non-polar |
| S    | 388   | 0.8      | C>CT   | HET                                    | 245               | 82         | Ser                       | Polar          | Phe                           | Non-polar |
| S    | 314   | 0.8      | G>AG   | HET                                    | 257               | 86         | Trp                       |                | STOP                          |           |
| M    | 2505  | 0.8      | G>AG   | HET                                    | 258               | 86         | Trp                       |                | STOP                          |           |
| K    | 722   | 0.6      | C>CT   | HET                                    | 264               | 88         | Leu                       | Silent         |                               |           |
| M    | 2419  | 0.8      | C>CT   | HET                                    | 264               | 88         | Leu                       | Silent         |                               |           |
| S    | 732   | 0.6      | G>AG   | HET                                    | 270               | 90         | Trp                       |                | STOP                          |           |
| K    | 472   | 0.8      | G>GA   | HET                                    | 284               | 95         | Cys                       | Polar          | Tyr                           | Polar     |
| M    | 2464  | 0.8      | G>A    | HOM                                    | 286               | 96         | Val                       | Non-polar      | Ile                           | Non-polar |
| M    | 1069  | 0.6      | G>AG   | HET                                    | 296               | 99         | Gly                       | Polar          | Asp                           | Acidic    |
| S    | 127   | 0.8      | C>CT   | HET                                    | 297               | 99         | Gly                       | Silent         |                               |           |
| M    | 814   | 0.6      | G>A    | HOM                                    | 310               | 104        | Ala                       | Non-polar      | Thr                           | Polar     |
| K    | 164   | 0.6      | C>CT   | HET                                    | 312               | 104        | Ala                       | Silent         |                               |           |
| S    | 635   | 0.6      | C>CT   | HET                                    | 315               | 105        | His                       | Silent         |                               |           |
| S    | 1021  | 0.6      | G>AG   | HET                                    | 316               | 106        | Glu                       | Acidic         | Lys                           | Basic     |
| S    | 135   | 0.8      | C>CT   | HET                                    | 321               | 107        | Cys                       | Silent         |                               |           |
| M    | 2234  | 0.8      | G>GA   | HET                                    | 322               | 108        | Gly                       | Polar          | Ser                           | Polar     |
| S    | 418   | 0.8      | C>CT   | HET                                    | 328               | 110        | His                       | Basic          | Tyr                           | Polar     |
| M    | 951   | 0.6      | C>T    | HOM                                    | 330               | 110        | His                       | Silent         |                               |           |
| S    | 422   | 0.8      | C>CT   | HET                                    | 333               | 111        | Ala                       | Silent         |                               |           |
| M    | 888   | 0.6      | C>CT   | HET                                    | 345               | 115        | Tyr                       | Silent         |                               |           |
| M    | 643   | 0.6      | G>AG   | HET                                    | 350               | 117        | Trp                       |                | STOP                          |           |
| S    | 17    | 0.8      | G>AG   | HET                                    | 355               | 119        | Asp                       | Acidic         | Asn                           | Polar     |
| S    | 57    | 0.8      | C>CT   | HET                                    | 366               | 122        | Val                       | Silent         |                               |           |
| K    | 692   | 0.6      | G>GA   | HET                                    | 367               | 123        | Gly                       | Polar          | Ser                           | Polar     |
| S    | 149   | 0.8      | G>AG   | HET                                    | 367               | 123        | Gly                       | Polar          | Ser                           | Polar     |
| K    | 647   | 0.4      | G>GA   | HET                                    | 368               | 123        | Gly                       | Polar          | Asp                           | Polar     |
| S    | 740   | 0.6      | C>CT   | HET                                    | 375               | 125        | Ile                       | Silent         |                               |           |
| M    | 2326  | 0.8      | C>CT   | HET                                    | 388               | 130        | Leu                       | Non-polar      | Phe                           | Non-polar |
| M    | 830   | 0.6      | C>CT   | HET                                    | 390               | 130        | Leu                       | Silent         |                               |           |
| K    | 71    | 0.8      | C>CT   | HET                                    | 405               | 135        | Phe                       | Silent         |                               |           |
| S    | 131   | 0.8      | C>T    | HOM                                    | 408               | 136        | Ser                       | Silent         |                               |           |
| S    | 689   | 0.6      | C>CT   | HET                                    | 408               | 136        | Ser                       | Silent         |                               |           |
| S    | 1015  | 0.6      | C>CT   | HET                                    | 408               | 136        | Ser                       | Silent         |                               |           |
| K    | 60    | 0.8      | C>CT   | HET                                    | 417               | 139        | Tyr                       | Silent         |                               |           |
| K    | 350   | 0.6      | C>CT   | HET                                    | 421               | 141        | His                       | Basic          | Tyr                           | Polar     |
| K    | 143   | 0.6      | G>A    | HOM                                    | 425               | 142        | Arg                       | Basic          | Gln                           | Polar     |
| M    | 2179  | 0.8      | G>A    | HOM                                    | 428               | 143        | Arg                       | Basic          | His                           | Basic     |
| M    | 1112  | 0.6      | C>CT   | HET                                    | 432               | 144        | His                       | Silent         |                               |           |
| S    | 322   | 0.8      | C>CT   | HET                                    | 437               | 146        | Ser                       | Polar          | Phe                           | Non-polar |
| M    | 1083  | 0.6      | C>CT   | HET                                    | 438               | 146        | Ser                       | Silent         |                               |           |
| M    | 962   | 0.6      | G>GA   | HET                                    | 458               | 153        | Arg                       | Basic          | Lys                           | Basic     |
| M    | 1069  | 0.6      | G>AG   | HET                                    | 458               | 153        | Arg                       | Basic          | Lys                           | Basic     |
| M    | 1070  | 0.6      | G>AG   | HET                                    | 458               | 153        | Arg                       | Basic          | Lys                           | Basic     |
| M    | 635   | 0.6      | C>CT   | HET                                    | 475               | 159        | Pro                       | Non-polar      | Ser                           | Polar     |
| M    | 611   | 0.6      | G>A    | HOM                                    | 480               | 160        | Lys                       | Silent         |                               |           |
| K    | 430   | 0.8      | G>GA   | HET                                    | 490               | 164        | Asp                       | Acidic         | Asn                           | Polar     |
| K    | 750   | 0.6      | G>GA   | HET                                    | 498               | 166        | Lys                       | Silent         |                               |           |
| M    | 2345  | 0.8      | G>AG   | HET                                    | 510               | 170        | Lys                       | Silent         |                               |           |
| K    | 325   | 0.6      | G>A    | HOM                                    | 543               | 181        | Met                       | Non-polar      | Ile                           | Non-polar |
| M    | 14    | 0.4      | C>CT   | HET                                    | 560               | 187        | Thr                       | Polar          | Asn                           | Polar     |
| M    | 2466  | 0.8      | G>AG   | HET                                    | 566               | 189        | Gly                       | Polar          | Asp                           | Acidic    |
| S    | 108   | 0.8      | G>AG   | HET                                    | 566               | 189        | Gly                       | Polar          | Asp                           | Acidic    |
| M    | 362   | 0.6      | G>GA   | HET                                    | 570               | 190        | Trp                       |                | STOP                          |           |
| K    | 420   | 0.8      | C>CT   | HET                                    | 579               | 193        | Tyr                       | Silent         |                               |           |
| S    | 92    | 0.8      | G>AG   | HET                                    | 598               | 200        | Gly                       | Polar          | Arg                           | Basic     |
| M    | 965   | 0.6      | C>CT   | HET                                    | 615               | 205        | Gly                       | Silent         |                               |           |
| M    | 2515  | 0.8      | G>AG   | HET                                    | 616               | 206        | Gly                       | Polar          | Tyr                           | Polar     |
| S    | 32    | 0.8      | G>AG   | HET                                    | 617               | 206        | Gly                       | Polar          | Asp                           | Acidic    |
| M    | 2127  | 0.8      | C>CT   | HET                                    | 623               | 208        | Ala                       | Non-polar      | Val                           | Non-polar |
| S    | 305   | 0.8      | C>CT   | HET                                    | 623               | 208        | Ala                       | Non-polar      | Val                           | Non-polar |
| M    | 2287  | 0.8      | C>CT   | HET                                    | 627               | 209        | Cys                       | Silent         |                               |           |
| M    | 967   | 0.6      | C>CT   | HET                                    | 633               | 211        | Phe                       | Silent         |                               |           |

|   |      |     |      |     |     |     |     |           |     |           |
|---|------|-----|------|-----|-----|-----|-----|-----------|-----|-----------|
| M | 1136 | 0.6 | C>CT | HET | 633 | 211 | Phe | Silent    |     |           |
| S | 350  | 0.8 | C>CT | HET | 634 | 212 | His | Basic     | Tyr | Polar     |
| M | 2444 | 0.8 | C>CT | HET | 637 | 213 | Pro | Non-polar | Ser | Polar     |
| K | 497  | 0.4 | C>CT | HET | 642 | 214 | Asn | Silent    |     |           |
| S | 265  | 0.8 | C>A  | HOM | 642 | 214 | Asn | Polar     | Lys | Basic     |
| M | 2547 | 0.8 | G>AG | HET | 643 | 215 | Ala | Non-polar | Thr | Polar     |
| S | 770  | 0.6 | C>CT | HET | 657 | 219 | Asn | Silent    |     |           |
| S | 1154 | 0.6 | C>CT | HET | 657 | 219 | Asn | Silent    |     |           |
| S | 354  | 0.8 | G>A  | HOM | 662 | 221 | Arg | Basic     | His | Basic     |
| M | 2481 | 0.8 | C>CT | HET | 684 | 228 | Ile | Silent    |     |           |
| S | 405  | 0.8 | C>CT | HET | 686 | 229 | Ser | Polar     | Phe | Non-polar |
| K | 938  | 0.6 | C>CT | HET | 687 | 229 | Ser | Silent    |     |           |
| S | 585  | 0.6 | C>T  | HOM | 687 | 229 | Ser | Silent    |     |           |
| S | 336  | 0.8 | C>CT | HET | 702 | 234 | Leu | Silent    |     |           |
| M | 405  | 0.6 | C>T  | HOM | 704 | 235 | Ala | Non-polar | Val | Non-polar |
| M | 2552 | 0.8 | G>AG | HET | 710 | 237 | Cys | Polar     | Tyr | Polar     |
| M | 2381 | 0.8 | G>AG | HET | 715 | 239 | Gly | Polar     | Ser | Polar     |
| K | 47   | 0.8 | G>AG | HET | 716 | 239 | Gly | Polar     | Asp | Acidic    |
| S | 389  | 0.8 | C>CT | HET | 729 | 243 | Tyr | Silent    |     |           |
| K | 411  | 0.8 | C>CT | HET | 732 | 244 | Ala | Silent    |     |           |
| M | 2210 | 0.8 | C>CT | HET | 737 | 246 | Ala | Non-polar | Val | Non-polar |
| M | 2248 | 0.8 | C>TC | HOM | 737 | 246 | Ala | Non-polar | Val | Non-polar |
| S | 619  | 0.6 | G>A  | HOM | 743 | 248 | Gly | Polar     | Glu | Acidic    |
| M | 2349 | 0.8 | G>A  | HOM | 772 | 258 | Val | Non-polar | Ile | Non-polar |
| M | 830  | 0.6 | C>CT | HET | 776 | 259 | Pro | Non-polar | Leu | Non-polar |
| S | 244  | 0.8 | C>CT | HET | 776 | 259 | Pro | Non-polar | Leu | Non-polar |
| S | 243  | 0.8 | G>AG | HET | 777 | 259 | Pro | Silent    |     |           |
| M | 2147 | 0.8 | C>CT | HET | 778 | 260 | Leu | Non-polar | Phe | Non-polar |
| M | 2135 | 0.8 | G>GA | HET | 807 | 269 | Leu | Silent    |     |           |
| M | 2170 | 0.8 | G>GA | HET | 807 | 269 | Leu | Silent    |     |           |
| S | 1154 | 0.6 | C>CT | HET | 816 | 272 | Tyr | Silent    |     |           |
| M | 1085 | 0.6 | G>AG | HET | 876 | 292 | Arg | Silent    |     |           |
| S | 329  | 0.8 | C>CT | HET | 890 | 297 | Thr | Polar     | Ile | Non-polar |
| M | 1020 | 0.6 | C>CT | HET | 924 | 308 | Val | Silent    |     |           |
| M | 2230 | 0.8 | C>CT | HET | 939 | 313 | Thr | Silent    |     |           |

Supplemental Table 4. Mutations in *BnaC.FAD2.a* identified in the JBnaCAB\_E population.

Supplemental Figure 1. BnaFAD2 sequence alignment

|                 |       | Section 1         |                       |                |                 |         |          |         |        |        |     |       |
|-----------------|-------|-------------------|-----------------------|----------------|-----------------|---------|----------|---------|--------|--------|-----|-------|
|                 |       | (1)               | 1                     | 10             | 20              | 30      | 40       | 50      | 55     |        |     |       |
| Tap_BnaC.FAD2.a | (1)   | ATGGG             | TGCAGGTGGAAGAATGCAAGT | GTCTCCTCCCTCCA | AGAAAGTCTGAAACC | G       |          |         |        |        |     |       |
| Cab_BnaC.FAD2.a | (1)   | ATGGG             | TGCAGGTGGAAGAATGCAAGT | GTCTCCTCCCTCCA | AGAAAGTCTGAAACC | G       |          |         |        |        |     |       |
| Tap_BnaA.FAD2.a | (1)   | ATGGG             | TGCAGGTGGAAGAATGCAAGT | GTCTCCTCCCTCCA | AAAGTCTGAAACC   | G       |          |         |        |        |     |       |
| Cab_BnaA.FAD2.a | (1)   | ATGGG             | TGCAGGTGGAAGAATGCAAGT | GTCTCCTCCCTCCA | AAAGTCTGAAACC   | G       |          |         |        |        |     |       |
| Tap_BnaC.FAD2.b | (1)   | ATGGG             | GCAGGTGGAAGAATGCAAGT  | C              | TCTCCTCCCTCCA   | GCTCCC  | C        | GAAACC  | A      |        |     |       |
| Tap_BnaA.FAD2.b | (1)   | ATGGG             | GCAGGTGGAAGAATGCAAGT  | C              | TCTCCTCCCTCCA   | GCTCCC  | C        | GAAACC  | A      |        |     |       |
| Cab_BnaA.FAD2.b | (1)   | ATGGG             | GCAGGTGGAAGAATGCAAGT  | C              | TCTCCTCCCTCCA   | GCTCCC  | C        | GAAACC  | A      |        |     |       |
|                 |       | Section 2         |                       |                |                 |         |          |         |        |        |     |       |
|                 |       | (56)              | 56                    | 70             | 80              | 90      | 100      | 110     |        |        |     |       |
| Tap_BnaC.FAD2.a | (56)  | ACAAC             | ATCAAGCGCGTA          | CCCTGCGAGACACC | GCC             | CTTCACT | GTCGGAGA | ACTCAA  |        |        |     |       |
| Cab_BnaC.FAD2.a | (56)  | ACAAC             | ATCAAGCGCGTA          | CCCTGCGAGACACC | GCC             | CTTCACT | GTCGGAGA | ACTCAA  |        |        |     |       |
| Tap_BnaA.FAD2.a | (56)  | ACAAC             | ATCAAGCGCGTA          | CCCTGCGAGACACC | GCC             | CTTCACT | GTCGGAGA | ACTCAA  |        |        |     |       |
| Cab_BnaA.FAD2.a | (56)  | ACAAC             | ATCAAGCGCGTA          | CCCTGCGAGACACC | GCC             | CTTCACT | GTCGGAGA | ACTCAA  |        |        |     |       |
| Tap_BnaC.FAD2.b | (56)  | AAAC              | CTCAAACGCGT           | C              | CCCTGCGAGACACC  | ACC     | CTTCACT  | C       | T      | CGGAGA | C   | CTCAA |
| Tap_BnaA.FAD2.b | (56)  | ACAAC             | CTCAAACGCGT           | C              | CCCTGCGAGACACC  | ACC     | ATTCACT  | C       | T      | CGGAGA | C   | CTCAA |
| Cab_BnaA.FAD2.b | (56)  | ACAAC             | CTCAAACGCGT           | C              | CCCTGCGAGACACC  | ACC     | ATTCACT  | C       | T      | CGGAGA | C   | CTCAA |
|                 |       | Section 3         |                       |                |                 |         |          |         |        |        |     |       |
|                 |       | (111)             | 111                   | 120            | 130             | 140     | 150      | 165     |        |        |     |       |
| Tap_BnaC.FAD2.a | (111) | GAAAGCAATCCCACC   | G                     | CACTG          | TTCAAACGCTC     | GATCCC  | TCGCTC   | TTCTCCT | AC     |        |     |       |
| Cab_BnaC.FAD2.a | (111) | GAAAGCAATCCCACC   | G                     | CACTG          | TTCAAACGCTC     | GATCCC  | TCGCTC   | TTCTCCT | AC     |        |     |       |
| Tap_BnaA.FAD2.a | (111) | GAAAGCAATCCCACC   | G                     | CACTG          | TTCAAACGCTC     | GATCCC  | TCGCTC   | TTCTCCT | AC     |        |     |       |
| Cab_BnaA.FAD2.a | (111) | GAAAGCAATCCCACC   | G                     | CACTG          | TTCAAACGCTC     | GATCCC  | TCGCTC   | TTCTCCT | AC     |        |     |       |
| Tap_BnaC.FAD2.b | (111) | GAAAGCAATCCCACC   | T                     | CACTG          | TTCAAACGCTC     | CATCCC  | TCGCTC   | TTCTCCT | AC     |        |     |       |
| Tap_BnaA.FAD2.b | (111) | GAAAGCAATCCCACC   | T                     | CACTG          | TTCAAACGCTC     | CATCCC  | ACGCTC   | TTCTCCT | -      | C      |     |       |
| Cab_BnaA.FAD2.b | (111) | GAAAGCAATCCCACC   | T                     | CACTG          | TTCAAACGCTC     | CATCCC  | ACGCTC   | TTCTCCT | -      | C      |     |       |
|                 |       | Section 4         |                       |                |                 |         |          |         |        |        |     |       |
|                 |       | (166)             | 166                   | 180            | 190             | 200     | 210      | 220     |        |        |     |       |
| Tap_BnaC.FAD2.a | (166) | CTCATCTGGGACATC   | --                    | ATCATAGC       | CTCCTGCT        | TCTACT  | TACGTC   | CGCCAC  | CACTTA |        |     |       |
| Cab_BnaC.FAD2.a | (166) | CTCATCTGGGACATC   | --                    | ATCATAGC       | CTCCTGCT        | TCTACT  | TACGTC   | CGCCAC  | CACTTA |        |     |       |
| Tap_BnaA.FAD2.a | (166) | CTCATCTGGGACATC   | --                    | ATCATAGC       | CTCCTGCT        | TCTACT  | TACGTC   | CGCCAC  | CACTTA |        |     |       |
| Cab_BnaA.FAD2.a | (166) | CTCATCTGGGACATC   | --                    | ATCATAGC       | CTCCTGCT        | TCTACT  | TACGTC   | CGCCAC  | CA     | -      | ITA |       |
| Tap_BnaC.FAD2.b | (166) | CTCCTCTTCGACATC   | --                    | CTGTC          | CTCCTC          | CTTACT  | CACCTC   | TCCAC   | AG     | C      | TA  |       |
| Tap_BnaA.FAD2.b | (165) | TTGACATCATCATCTCC | TC                    | CTCG           | GCTCCT          | CTTACT  | CACCTC   | TCCAC   | AG     | C      | TA  |       |
| Cab_BnaA.FAD2.b | (165) | TTGACATCATCATCTCC | TC                    | CTCG           | GCTCCT          | CTTACT  | CACCTC   | TCCAC   | AG     | C      | TA  |       |
|                 |       | Section 5         |                       |                |                 |         |          |         |        |        |     |       |
|                 |       | (221)             | 221                   | 230            | 240             | 250     | 260      | 275     |        |        |     |       |
| Tap_BnaC.FAD2.a | (219) | CTTCCCTCTCC       | TCCCTCACCCCTCTCT      | CTTACT         | TCGCCTG         | GCCT    | CTCTACT  | GGGCC   |        |        |     |       |
| Cab_BnaC.FAD2.a | (219) | CTTCCCTCTCC       | TCCCTCACCCCTCTCT      | CTTACT         | TCGCCTG         | GCCT    | CTCTACT  | GGGCC   |        |        |     |       |
| Tap_BnaA.FAD2.a | (219) | CTTCCCTCTCC       | TCCCTCACCCCTCTCT      | CTTACT         | TCGCCTG         | GCCT    | CTCTACT  | GGGCC   |        |        |     |       |
| Cab_BnaA.FAD2.a | (218) | CTTCCCTCTCC       | TCCCTCACCCCTCTCT      | CTTACT         | TCGCCTG         | GCCT    | CTCTACT  | GGGCC   |        |        |     |       |
| Tap_BnaC.FAD2.b | (219) | CTTCCCTCTCC       | TCCCTCACCCCTCTCT      | CTTACT         | TCGCCTG         | GCCT    | CTCTACT  | GGGCC   |        |        |     |       |
| Tap_BnaA.FAD2.b | (220) | CTTCCCTCTCC       | -----                 | CTTACT         | TCGCCTG         | ACC     | CTCTACT  | GGGCC   |        |        |     |       |
| Cab_BnaA.FAD2.b | (220) | CTTCCCTCTCC       | -----                 | CTTACT         | TCGCCTG         | ACC     | CTCTACT  | GGGCC   |        |        |     |       |

Supplemental Figure 1. BnaFAD2 sequence alignment

|                 |       | Section 6 |     |     |       |        |     |     |     |        |      |       |       |        |        |      |
|-----------------|-------|-----------|-----|-----|-------|--------|-----|-----|-----|--------|------|-------|-------|--------|--------|------|
|                 |       | 276       | 290 |     |       | 300    | 310 |     | 320 |        | 330  |       |       |        |        |      |
| Tap_BnaC.FAD2.a | (276) | TGCCA     | AGG | G   | TGCGT | CCTAAC | C   | GGC | G   | TCTGGG | TCAT | AGCCC | CACGA | GTGCGG | CACC   |      |
| Cab_BnaC.FAD2.a | (274) | TGCCA     | AGG | G   | TGCGT | CCTAAC | C   | GGC | G   | TCTGGG | TCAT | AGCCC | CACGA | GTGCGG | CACC   |      |
| Tap_BnaA.FAD2.a | (274) | TGCCA     | G   | GGC | TGCGT | CCTAAC | C   | GGC | G   | TCTGGG | TCAT | AGCCC | CACGA | GTGCGG | CACC   |      |
| Cab_BnaA.FAD2.a | (273) | TGCCA     | G   | GGC | TGCGT | CCTAAC | C   | GGC | G   | TCTGGG | TCAT | AGCCC | CACGA | GTGCGG | CACC   |      |
| Tap_BnaC.FAD2.b | (274) | TGCCA     | AGG | C   | TGCGT | CCTAAC | G   | GGC | C   | TCTGGG | TCAT | C     | GCCC  | CACGA  | ATGCGG | CACC |
| Tap_BnaA.FAD2.b | (260) | TGCCA     | AGG | C   | TGCGT | CCTAAC | G   | GGC | C   | TCTGGG | TCAT | AGCCC | CACGA | GTGCGG | CACC   |      |
| Cab_BnaA.FAD2.b | (260) | TGCCA     | AGG | C   | TGCGT | CCTAAC | G   | GGC | C   | TCTGGG | TCAT | AGCCC | CACGA | GTGCGG | CACC   |      |

  

|                 |       | Section 7 |          |   |        |       |     |        |     |      |     |     |   |     |      |       |
|-----------------|-------|-----------|----------|---|--------|-------|-----|--------|-----|------|-----|-----|---|-----|------|-------|
|                 |       | 331       | 340      |   |        | 350   | 360 |        | 370 |      | 385 |     |   |     |      |       |
| Tap_BnaC.FAD2.a | (329) | ACGCCT    | TCAGCGAC | T | ACCAGT | TGGCT | T   | GACGAC | A   | CCGT | C   | GGT | C | TCA | TCTT | CACTC |
| Cab_BnaC.FAD2.a | (329) | ACGCCT    | TCAGCGAC | T | ACCAGT | TGGCT | T   | GACGAC | A   | CCGT | C   | GGT | C | TCA | TCTT | CACTC |
| Tap_BnaA.FAD2.a | (329) | ACGCCT    | TCAGCGAC | T | ACCAGT | TGGCT | G   | GACGAC | A   | CCGT | C   | GGC | C | TCA | TCTT | CACTC |
| Cab_BnaA.FAD2.a | (328) | ACGCCT    | TCAGCGAC | T | ACCAGT | TGGCT | G   | GACGAC | A   | CCGT | C   | GGC | C | TCA | TCTT | CACTC |
| Tap_BnaC.FAD2.b | (329) | ACGCCT    | TCAGCGAC | C | ACCAGT | TGGCT | G   | GACGAC | G   | CCGT | G   | GGC | C | TCA | TCTT | CACTC |
| Tap_BnaA.FAD2.b | (315) | ACGCCT    | TCAGCGAC | C | ACCAGT | TGGCT | G   | GACGAC | G   | CCGT | C   | GGC | C | TCA | TCTT | CACTC |
| Cab_BnaA.FAD2.b | (315) | ACGCCT    | TCAGCGAC | C | ACCAGT | TGGCT | G   | GACGAC | G   | CCGT | C   | GGC | C | TCA | TCTT | CACTC |

  

|                 |       | Section 8 |           |   |       |        |        |      |     |     |     |        |        |     |
|-----------------|-------|-----------|-----------|---|-------|--------|--------|------|-----|-----|-----|--------|--------|-----|
|                 |       | 386       | 400       |   |       | 410    | 420    |      | 430 |     | 440 |        |        |     |
| Tap_BnaC.FAD2.a | (384) | CTTCCT    | CCTCGTCCC | T | TACTT | TCTCCT | GGAAGT | TACA | GT  | CAT | C   | GACGCC | ACCATT | TCC |
| Cab_BnaC.FAD2.a | (384) | CTTCCT    | CCTCGTCCC | T | TACTT | TCTCCT | GGAAGT | TACA | GT  | CAT | C   | GACGCC | ACCATT | TCC |
| Tap_BnaA.FAD2.a | (384) | CTTCCT    | CCTCGTCCC | T | TACTT | TCTCCT | GGAAGT | TACA | GT  | CAT | C   | GACGCC | ACCATT | TCC |
| Cab_BnaA.FAD2.a | (383) | CTTCCT    | CCTCGTCCC | T | TACTT | TCTCCT | GGAAGT | TACA | GT  | CAT | C   | GACGCC | ACCATT | TCC |
| Tap_BnaC.FAD2.b | (384) | CTTCCT    | CCTCGTCCC | T | TACTT | TCTCCT | GGAAGT | TACA | GC  | CAT | C   | GACGCC | ACCATT | TCC |
| Tap_BnaA.FAD2.b | (370) | CTTCCT    | CCTCGTCCC | G | TACTT | TCTCCT | GGAAGT | TACA | TC  | CAT | -   | GACGCC | ACCATT | TCC |
| Cab_BnaA.FAD2.b | (370) | CTTCCT    | CCTCGTCCC | G | TACTT | TCTCCT | GGAAGT | TACA | TC  | CAT | -   | GACGCC | ACCATT | TCC |

  

|                 |       | Section 9 |     |    |       |        |        |     |       |       |     |        |          |          |      |        |          |   |     |      |
|-----------------|-------|-----------|-----|----|-------|--------|--------|-----|-------|-------|-----|--------|----------|----------|------|--------|----------|---|-----|------|
|                 |       | 441       | 450 |    |       | 460    | 470    |     | 480   |       | 495 |        |          |          |      |        |          |   |     |      |
| Tap_BnaC.FAD2.a | (439) | AACAC     | TGG | C  | TCCCT | CGAGAG | A      | GAC | GAAGT | GTT   | T   | GTCCCC | AAGAAGAA | GTCA     | GACA |        |          |   |     |      |
| Cab_BnaC.FAD2.a | (439) | AACAC     | TGG | C  | TCCCT | CGAGAG | A      | GAC | GAAGT | GTT   | T   | GTCCCC | AAGAAGAA | GTCA     | GACA |        |          |   |     |      |
| Tap_BnaA.FAD2.a | (439) | AACAC     | TGG | C  | TCCCT | CGAGAG | A      | GAC | GAAGT | GTT   | T   | GTCCCC | AAGAAGAA | GTCA     | GACA |        |          |   |     |      |
| Cab_BnaA.FAD2.a | (438) | AACAC     | TGG | C  | TCCCT | CGAGAG | A      | GAC | GAAGT | GTT   | T   | GTCCCC | AAGAAGAA | GTCA     | GACA |        |          |   |     |      |
| Tap_BnaC.FAD2.b | (439) | AACAC     | C   | GG | A     | TCCCT  | CGAGAG | G   | GAT   | GAAGT | GTT | C      | GTCCCC   | AAGAAGAA | A    | TCC    | GACA     |   |     |      |
| Tap_BnaA.FAD2.b | (424) | AACAC     | C   | GG | A     | TCCCT  | CGA    | T   | AG    | G     | GAC | C      | GAAGT    | GTT      | C    | GTCCCC | AAGAAGAA | A | TCC | GACA |
| Cab_BnaA.FAD2.b | (424) | AACAC     | C   | GG | A     | TCCCT  | CGA    | T   | AG    | G     | GAC | C      | GAAGT    | GTT      | C    | GTCCCC | AAGAAGAA | A | TCC | GACA |

  

|                 |       | Section 10 |          |   |        |         |     |        |     |       |      |   |        |   |      |
|-----------------|-------|------------|----------|---|--------|---------|-----|--------|-----|-------|------|---|--------|---|------|
|                 |       | 496        | 510      |   |        | 520     | 530 |        | 540 |       | 550  |   |        |   |      |
| Tap_BnaC.FAD2.a | (494) | TCAAGT     | TGGTACGG | C | AAGTAC | CTCAACA | A   | CCCTTT | T   | GGGAC | GCAC | C | GTGATG | T | TAAC |
| Cab_BnaC.FAD2.a | (494) | TCAAGT     | TGGTACGG | C | AAGTAC | CTCAACA | A   | CCCTTT | T   | GGGAC | GCAC | C | GTGATG | T | TAAC |
| Tap_BnaA.FAD2.a | (494) | TCAAGT     | TGGTACGG | C | AAGTAC | CTCAACA | A   | CCCTTT | T   | GGGAC | GCAC | C | GTGATG | T | TAAC |
| Cab_BnaA.FAD2.a | (493) | TCAAGT     | TGGTACGG | C | AAGTAC | CTCAACA | A   | CCCTTT | T   | GGGAC | GCAC | C | GTGATG | T | TAAC |
| Tap_BnaC.FAD2.b | (494) | TCAAGT     | TGGTACGG | A | AAGTAC | CTCAACA | A   | CCCGC  | T   | AGGAC | GCAC | G | GTGATG | C | TAAC |
| Tap_BnaA.FAD2.b | (479) | TCAAGT     | TGGTACGG | C | AAGTAC | CTCAACA | A   | CCCGC  | T   | AGGAC | GCAC | G | GTGATG | C | TAAC |
| Cab_BnaA.FAD2.b | (479) | TCAAGT     | TGGTACGG | C | AAGTAC | CTCAACA | A   | CCCGC  | T   | AGGAC | GCAC | G | GTGATG | C | TAAC |



Supplemental Figure 1. BnaFAD2 sequence alignment

|                 |       | Section 11 |     |     |     |     |     |     |   |   |   |   |   |   |   |   |   |   |   |   |   |   |   |   |   |   |   |   |   |   |   |   |   |   |   |   |   |   |   |   |   |   |   |   |   |   |   |   |   |   |   |   |   |   |   |
|-----------------|-------|------------|-----|-----|-----|-----|-----|-----|---|---|---|---|---|---|---|---|---|---|---|---|---|---|---|---|---|---|---|---|---|---|---|---|---|---|---|---|---|---|---|---|---|---|---|---|---|---|---|---|---|---|---|---|---|---|---|
|                 |       | (551)      | 551 | 560 | 570 | 580 | 590 | 605 |   |   |   |   |   |   |   |   |   |   |   |   |   |   |   |   |   |   |   |   |   |   |   |   |   |   |   |   |   |   |   |   |   |   |   |   |   |   |   |   |   |   |   |   |   |   |   |
| Tap_BnaC.FAD2.a | (549) | G          | G   | T   | T   | C   | A   | G   | T | T | C | A | C | T | C | T | C | T | C | G | G | A | A | G | A |   |   |   |   |   |   |   |   |   |   |   |   |   |   |   |   |   |   |   |   |   |   |   |   |   |   |   |   |   |   |
| Cab_BnaC.FAD2.a | (549) | G          | G   | T   | T   | C   | A   | G   | T | T | C | A | C | T | C | T | C | T | C | G | G | A | A | G | A |   |   |   |   |   |   |   |   |   |   |   |   |   |   |   |   |   |   |   |   |   |   |   |   |   |   |   |   |   |   |
| Tap_BnaA.FAD2.a | (549) | G          | G   | T   | T   | C   | A   | G   | T | T | C | A | C | T | C | T | C | T | C | G | G | A | A | G | A |   |   |   |   |   |   |   |   |   |   |   |   |   |   |   |   |   |   |   |   |   |   |   |   |   |   |   |   |   |   |
| Cab_BnaA.FAD2.a | (548) | G          | G   | T   | T   | C   | A   | G   | T | T | C | A | C | T | C | T | C | T | C | G | G | A | A | G | A |   |   |   |   |   |   |   |   |   |   |   |   |   |   |   |   |   |   |   |   |   |   |   |   |   |   |   |   |   |   |
| Tap_BnaC.FAD2.b | (549) | C          | G   | T   | T   | C   | A   | G   | T | T | C | A | C | T | C | T | C | T | C | G | G | A | A | G | A |   |   |   |   |   |   |   |   |   |   |   |   |   |   |   |   |   |   |   |   |   |   |   |   |   |   |   |   |   |   |
| Tap_BnaA.FAD2.b | (534) | C          | G   | T   | T   | C   | A   | G   | T | T | C | A | C | T | C | T | C | T | C | G | G | A | A | G | A |   |   |   |   |   |   |   |   |   |   |   |   |   |   |   |   |   |   |   |   |   |   |   |   |   |   |   |   |   |   |
| Cab_BnaA.FAD2.b | (534) | C          | G   | T   | T   | C   | A   | G   | T | T | C | A | C | T | C | T | C | T | C | G | G | A | A | G | A |   |   |   |   |   |   |   |   |   |   |   |   |   |   |   |   |   |   |   |   |   |   |   |   |   |   |   |   |   |   |
|                 |       | Section 12 |     |     |     |     |     |     |   |   |   |   |   |   |   |   |   |   |   |   |   |   |   |   |   |   |   |   |   |   |   |   |   |   |   |   |   |   |   |   |   |   |   |   |   |   |   |   |   |   |   |   |   |   |   |
|                 |       | (606)      | 606 | 620 | 630 | 640 | 650 | 660 |   |   |   |   |   |   |   |   |   |   |   |   |   |   |   |   |   |   |   |   |   |   |   |   |   |   |   |   |   |   |   |   |   |   |   |   |   |   |   |   |   |   |   |   |   |   |   |
| Tap_BnaC.FAD2.a | (604) | C          | C   | T   | T   | A   | C   | G   | A | C | G | G | C | T | T | C | G | C | T | T | G | C | A | T | T | T | C | C | A | C | C | C | A | A | C | G |   |   |   |   |   |   |   |   |   |   |   |   |   |   |   |   |   |   |   |
| Cab_BnaC.FAD2.a | (604) | C          | C   | T   | T   | A   | C   | G   | A | C | G | G | C | T | T | C | G | C | T | T | G | C | A | T | T | T | C | C | A | C | C | C | A | A | C | G |   |   |   |   |   |   |   |   |   |   |   |   |   |   |   |   |   |   |   |
| Tap_BnaA.FAD2.a | (604) | C          | C   | T   | T   | A   | C   | G   | A | C | G | G | C | T | T | C | G | C | T | T | G | C | A | T | T | T | C | C | A | C | C | C | A | A | C | G |   |   |   |   |   |   |   |   |   |   |   |   |   |   |   |   |   |   |   |
| Cab_BnaA.FAD2.a | (603) | C          | C   | T   | T   | A   | C   | G   | A | C | G | G | C | T | T | C | G | C | T | T | G | C | A | T | T | T | C | C | A | C | C | C | A | A | C | G |   |   |   |   |   |   |   |   |   |   |   |   |   |   |   |   |   |   |   |
| Tap_BnaC.FAD2.b | (604) | C          | C   | T   | T   | A   | C   | A   | G | C | G | G | T | T | T | C | G | C | T | T | G | C | A | T | T | T | C | C | A | C | C | C | A | A | C | G |   |   |   |   |   |   |   |   |   |   |   |   |   |   |   |   |   |   |   |
| Tap_BnaA.FAD2.b | (589) | C          | C   | T   | T   | A   | C   | A   | G | C | G | G | T | T | T | C | G | C | T | T | G | C | A | T | T | T | C | C | A | C | C | C | A | A | C | G |   |   |   |   |   |   |   |   |   |   |   |   |   |   |   |   |   |   |   |
| Cab_BnaA.FAD2.b | (589) | C          | C   | T   | T   | A   | C   | A   | G | C | G | G | T | T | T | C | G | C | T | T | G | C | A | T | T | T | C | C | A | C | C | C | A | A | C | G |   |   |   |   |   |   |   |   |   |   |   |   |   |   |   |   |   |   |   |
|                 |       | Section 13 |     |     |     |     |     |     |   |   |   |   |   |   |   |   |   |   |   |   |   |   |   |   |   |   |   |   |   |   |   |   |   |   |   |   |   |   |   |   |   |   |   |   |   |   |   |   |   |   |   |   |   |   |   |
|                 |       | (661)      | 661 | 670 | 680 | 690 | 700 | 715 |   |   |   |   |   |   |   |   |   |   |   |   |   |   |   |   |   |   |   |   |   |   |   |   |   |   |   |   |   |   |   |   |   |   |   |   |   |   |   |   |   |   |   |   |   |   |   |
| Tap_BnaC.FAD2.a | (659) | A          | C   | C   | G   | T   | C   | T   | C | C | A | G | A | T | A | C | A | T | C | T | C | G | A | C | G | T | G | G | C | A | T | C | C | T | C | G | T | A |   |   |   |   |   |   |   |   |   |   |   |   |   |   |   |   |   |
| Cab_BnaC.FAD2.a | (659) | A          | C   | C   | G   | T   | C   | T   | C | C | A | G | A | T | A | C | A | T | C | T | C | G | A | C | G | T | G | G | C | A | T | C | C | T | C | G | T | A |   |   |   |   |   |   |   |   |   |   |   |   |   |   |   |   |   |
| Tap_BnaA.FAD2.a | (659) | A          | C   | C   | G   | T   | C   | T   | C | C | A | G | A | T | A | C | A | T | C | T | C | G | A | C | G | T | G | G | C | A | T | C | C | T | C | G | T | A |   |   |   |   |   |   |   |   |   |   |   |   |   |   |   |   |   |
| Cab_BnaA.FAD2.a | (658) | A          | C   | C   | G   | T   | C   | T   | C | C | A | G | A | T | A | C | A | T | C | T | C | G | A | C | G | T | G | G | C | A | T | C | C | T | C | G | T | A |   |   |   |   |   |   |   |   |   |   |   |   |   |   |   |   |   |
| Tap_BnaC.FAD2.b | (659) | A          | C   | C   | G   | T   | C   | T   | C | C | A | G | A | T | A | C | A | T | C | T | C | T | G | A | C | G | T | G | G | C | A | T | C | C | T | C | G | T | A |   |   |   |   |   |   |   |   |   |   |   |   |   |   |   |   |
| Tap_BnaA.FAD2.b | (644) | A          | C   | C   | G   | T   | C   | T   | C | C | A | G | A | T | A | C | A | T | C | T | C | T | G | A | C | G | T | G | G | C | A | T | C | C | T | C | G | T | A |   |   |   |   |   |   |   |   |   |   |   |   |   |   |   |   |
| Cab_BnaA.FAD2.b | (644) | A          | C   | C   | G   | T   | C   | T   | C | C | A | G | A | T | A | C | A | T | C | T | C | T | G | A | C | G | T | G | G | C | A | T | C | C | T | C | G | T | A |   |   |   |   |   |   |   |   |   |   |   |   |   |   |   |   |
|                 |       | Section 14 |     |     |     |     |     |     |   |   |   |   |   |   |   |   |   |   |   |   |   |   |   |   |   |   |   |   |   |   |   |   |   |   |   |   |   |   |   |   |   |   |   |   |   |   |   |   |   |   |   |   |   |   |   |
|                 |       | (716)      | 716 | 730 | 740 | 750 | 760 | 770 |   |   |   |   |   |   |   |   |   |   |   |   |   |   |   |   |   |   |   |   |   |   |   |   |   |   |   |   |   |   |   |   |   |   |   |   |   |   |   |   |   |   |   |   |   |   |   |
| Tap_BnaC.FAD2.a | (714) | C          | G   | G   | T   | C   | T   | C   | T | C | C | G | T | T | A | C | G | C | C | G | C | G | C | A | G | G | A | G | T | G | C | C | T | C | G | A | T | G | G | T | C | T | G | C | T | T | C | T | A | C |   |   |   |   |   |
| Cab_BnaC.FAD2.a | (714) | C          | G   | G   | T   | C   | T   | C   | T | C | C | G | T | T | A | C | G | C | C | G | C | G | C | A | G | G | A | G | T | G | C | C | T | C | G | A | T | G | G | T | C | T | G | C | T | T | C | T | A | C |   |   |   |   |   |
| Tap_BnaA.FAD2.a | (714) | C          | G   | G   | T   | C   | T   | C   | T | A | C | C | G | T | T | A | C | G | T | G | C | T | G | T | C | A | A | G | A | G | T | G | C | C | T | C | G | A | T | G | G | T | C | T | G | C | T | T | C | T | A | C |   |   |   |
| Cab_BnaA.FAD2.a | (713) | C          | G   | G   | T   | C   | T   | C   | T | A | C | C | G | T | T | A | C | G | T | G | C | T | G | T | C | A | A | G | A | G | T | G | C | C | T | C | G | A | T | G | G | T | C | T | G | C | T | T | C | T | A | C |   |   |   |
| Tap_BnaC.FAD2.b | (714) | C          | G   | G   | T   | C   | T   | C   | T | A | C | C | G | T | T | A | C | G | T | G | C | T | G | T | C | A | A | G | A | G | T | G | C | C | T | C | G | A | T | G | G | T | C | T | G | C | T | T | C | T | A | C |   |   |   |
| Tap_BnaA.FAD2.b | (699) | C          | G   | G   | T   | C   | T   | C   | T | A | C | C | G | T | T | A | C | G | T | G | C | T | G | T | C | A | A | G | A | G | T | A | G | C | C | T | C | G | A | T | G | G | T | C | T | G | C | T | T | C | T | A | C |   |   |
| Cab_BnaA.FAD2.b | (699) | N          | N   | N   | N   | N   | N   | N   | N | N | N | N | N | N | N | N | N | N | N | N | N | N | N | N | N | N | N | N | N | N | N | N | N | N | N | N | N | N | N | N | N | N | N | N | N | N | N | N | N | N | N | N | N | N | N |
|                 |       | Section 15 |     |     |     |     |     |     |   |   |   |   |   |   |   |   |   |   |   |   |   |   |   |   |   |   |   |   |   |   |   |   |   |   |   |   |   |   |   |   |   |   |   |   |   |   |   |   |   |   |   |   |   |   |   |
|                 |       | (771)      | 771 | 780 | 790 | 800 | 810 | 825 |   |   |   |   |   |   |   |   |   |   |   |   |   |   |   |   |   |   |   |   |   |   |   |   |   |   |   |   |   |   |   |   |   |   |   |   |   |   |   |   |   |   |   |   |   |   |   |
| Tap_BnaC.FAD2.a | (769) | G          | G   | A   | G   | T   | C   | C   | G | C | T | T | C | T | G | A | T | T | G | T | C | A | A | T | G | G | T | T | T | C | T | C | G | T | G | T | T | G | A | T | C | A | C | T | T | A | C | T | T | G | C | A | G | C |   |
| Cab_BnaC.FAD2.a | (769) | G          | G   | A   | G   | T   | C   | C   | G | C | T | T | C | T | G | A | T | T | G | T | C | A | A | T | G | G | T | T | T | C | T | C | G | T | G | T | T | G | A | T | C | A | C | T | T | A | C | T | T | G | C | A | G | C |   |
| Tap_BnaA.FAD2.a | (769) | G          | G   | A   | G   | T   | C   | C   | G | C | T | T | C | T | G | A | T | T | G | T | C | A | A | T | G | G | T | T | T | C | T | C | G | T | G | T | T | G | A | T | C | A | C | T | T | A | C | T | T | G | C | A | G | C |   |
| Cab_BnaA.FAD2.a | (768) | G          | G   | A   | G   | T   | C   | C   | G | C | T | T | C | T | G | A | T | T | G | T | C | A | A | T | G | G | T | T | T | C | T | C | G | T | G | T | T | G | A | T | C | A | C | T | T | A | C | T | T | G | C | A | G | C |   |
| Tap_BnaC.FAD2.b | (769) | G          | G   | A   | G   | T   | C   | C   | G | C | T | T | C | T | G | A | T | T | G | T | C | A | A | T | G | G | T | T | T | C | T | C | G | T | G | T | T | G | A | T | C | A | C | T | T | A | C | T | T | G | C | A | G | C |   |
| Tap_BnaA.FAD2.b | (754) | G          | G   | A   | G   | T   | C   | C   | G | C | T | T | C | T | G | A | T | T | G | T | C | A | A | T | G | G | T | T | T | C | T | C | G | T | G | T | T | G | A | T | C | A | C | T | T | A | C | T | T | G | C | A | G | C |   |
| Cab_BnaA.FAD2.b | (754) | G          | G   | A   | G   | T   | C   | C   | G | C | T | T | C | T | G | A | T | T | G | T | C | A | A | T | G | G | T | T | T | C | T | C | G | T | G | T | T | G | A | T | C | A | C | T | T | A | C | T | T | G | C | A | G | C |   |

Supplemental Figure 1. BnaFAD2 sequence alignment

|                 |        | Section 16                                                |      |      |      |      |      |
|-----------------|--------|-----------------------------------------------------------|------|------|------|------|------|
|                 |        | 826                                                       | 840  | 850  | 860  | 870  | 880  |
| Tap_BnaC.FAD2.a | (826)  | ACACGCATCCTTGCCTGCCTCACTACGATTCGTCCGAGTGGGATTGGTTGAGGGG   |      |      |      |      |      |
| Cab_BnaC.FAD2.a | (824)  | ACACGCATCCTTGCCTGCCTCACTACGATTCGTCCGAGTGGGATTGGTTGAGGGG   |      |      |      |      |      |
| Tap_BnaA.FAD2.a | (824)  | ACACGCATCCTTGCCTGCCTCACTATGATTCGTTCGAGTGGGATTGGTTGAGGGG   |      |      |      |      |      |
| Cab_BnaA.FAD2.a | (823)  | ACACGCATCCTTGCCTGCCTCACTATGATTCGTTCGAGTGGGATTGGTTGAGGGG   |      |      |      |      |      |
| Tap_BnaC.FAD2.b | (824)  | ACACGCACCCTTGCCTGCCTCACTATGATTCCTTCGAGTGGGATTGGTTGAGAGG   |      |      |      |      |      |
| Tap_BnaA.FAD2.b | (809)  | ACACGCACCCTTGCCTGCCTCACTATGATTCCTTCGAGTGGGATTGGTTGAGAGG   |      |      |      |      |      |
| Cab_BnaA.FAD2.b | (809)  | ACACGCANNCTNCTGCCTCACTATGATTCCTTCGAGTGGGATTGGTTGAGAGG     |      |      |      |      |      |
|                 |        | Section 17                                                |      |      |      |      |      |
|                 |        | 881                                                       | 890  | 900  | 910  | 920  | 935  |
| Tap_BnaC.FAD2.a | (879)  | AGCTTTGGCTACCGTTGACAGAGACTACGGAATCTTGAACAAGGTCFTCCACAAT   |      |      |      |      |      |
| Cab_BnaC.FAD2.a | (879)  | AGCTTTGGCTACCGTTGACAGAGACTACGGAATCTTGAACAAGGTCFTCCACAAT   |      |      |      |      |      |
| Tap_BnaA.FAD2.a | (879)  | AGCTTTGGCTACCGTTGACAGAGACTACGGAATCTTGAACAAGGTCFTCCACAAT   |      |      |      |      |      |
| Cab_BnaA.FAD2.a | (878)  | AGCTTTGGCTACCGTTGACAGAGACTACGGAATCTTGAACAAGGTCFTCCACAAT   |      |      |      |      |      |
| Tap_BnaC.FAD2.b | (879)  | AGCTTTGGCTACTGTGTGATAGAGACTATGGAATCTTGAACAAGGTGTTTCAATAAC |      |      |      |      |      |
| Tap_BnaA.FAD2.b | (864)  | AGCTTTGGCTACTGTGTGATAGAGACTATGGAATCTTGAACAAGGTGTTTCAATAAC |      |      |      |      |      |
| Cab_BnaA.FAD2.b | (864)  | AGCTTTGGCTACTGTGTGATAGAGACTATGGAATCTTGAACAAGGTGTTTCAATAAC |      |      |      |      |      |
|                 |        | Section 18                                                |      |      |      |      |      |
|                 |        | 936                                                       | 950  | 960  | 970  | 980  | 990  |
| Tap_BnaC.FAD2.a | (934)  | ATTACCGACACGCACGTGGCGCATCATCTGTTCTCCACGATGCCGCATTATCAC    |      |      |      |      |      |
| Cab_BnaC.FAD2.a | (934)  | ATTACCGACACGCACGTGGCGCATCATCTGTTCTCCACGATGCCGCATTATCAC    |      |      |      |      |      |
| Tap_BnaA.FAD2.a | (934)  | ATTACGGACACGCACGTGGCGCATCATCTGTTCTCCACGATGCCGCATTATCAT    |      |      |      |      |      |
| Cab_BnaA.FAD2.a | (933)  | ATTACGGACACGCACGTGGCGCATCATCTGTTCTCCACGATGCCGCATTATCAT    |      |      |      |      |      |
| Tap_BnaC.FAD2.b | (934)  | ATTACGGACACGCACGTGGCGCATCATCTGTTCTCCACGATGCCGCATTATAAC    |      |      |      |      |      |
| Tap_BnaA.FAD2.b | (919)  | ATTACGGACACGCACGTGGCGCATCATCTGTTCTCCACGATGCCGCATTATAAC    |      |      |      |      |      |
| Cab_BnaA.FAD2.b | (919)  | ATTACGGACACGCACGTGGCGCATCATCTGTTCTCCACGATGCCGCATTATAAC    |      |      |      |      |      |
|                 |        | Section 19                                                |      |      |      |      |      |
|                 |        | 991                                                       | 1000 | 1010 | 1020 | 1030 | 1045 |
| Tap_BnaC.FAD2.a | (988)  | GCGATGGAAGCTTACCAAGGCGATAAAGCCGATACTGGGGAGAGTATTATCAGTTT  |      |      |      |      |      |
| Cab_BnaC.FAD2.a | (988)  | GCGATGGAAGCTTACCAAGGCGATAAAGCCGATACTGGGGAGAGTATTATCAGTTT  |      |      |      |      |      |
| Tap_BnaA.FAD2.a | (988)  | GCGATGGAAGCTTACGAAGGCGATAAAGCCGATACTGGGGAGAGTATTATCAGTTT  |      |      |      |      |      |
| Cab_BnaA.FAD2.a | (987)  | GCGATGGAAGCTTACGAAGGCGATAAAGCCGATACTGGGGAGAGTATTATCAGTTT  |      |      |      |      |      |
| Tap_BnaC.FAD2.b | (988)  | GCGATGGAAGCGACCAAGGCGATAAAGCCGATACTTGGGGAGAGTATTATCAGTTT  |      |      |      |      |      |
| Tap_BnaA.FAD2.b | (973)  | GCGATGGAAGCGACCAAGGCGATAAAGCCGATACTTGGGGAGAGTATTATCAGTTT  |      |      |      |      |      |
| Cab_BnaA.FAD2.b | (973)  | GCGATGGAAGCGACCAAGGCGATAAAGCCGATACTTGGGGAGAGTATTATCAGTTT  |      |      |      |      |      |
|                 |        | Section 20                                                |      |      |      |      |      |
|                 |        | 1046                                                      | 1060 | 1070 | 1080 | 1090 | 1100 |
| Tap_BnaC.FAD2.a | (1042) | GATGGGACGCCGGTGGTTAAGGCGATGTGGAGGGAGGCGAAGGAGTGTATCTATG   |      |      |      |      |      |
| Cab_BnaC.FAD2.a | (1042) | GATGGGACGCCGGTGGTTAAGGCGATGTGGAGGGAGGCGAAGGAGTGTATCTATG   |      |      |      |      |      |
| Tap_BnaA.FAD2.a | (1042) | GATGGGACGCCGGTGGTTAAGGCGATGTGGAGGGAGGCGAAGGAGTGTATCTATG   |      |      |      |      |      |
| Cab_BnaA.FAD2.a | (1041) | GATGGGACGCCGGTGGTTAAGGCGATGTGGAGGGAGGCGAAGGAGTGTATCTATG   |      |      |      |      |      |
| Tap_BnaC.FAD2.b | (1042) | GATGGAACGCCGGTGGTTAAGGCGATGTGGAGGGAGGCGAAGGAGTGTATCTATG   |      |      |      |      |      |
| Tap_BnaA.FAD2.b | (1028) | GATGGAACGCCGGCGGTTAAGGCGATGTGGAGGGAGGCGAAGGAGTGTATCTATG   |      |      |      |      |      |
| Cab_BnaA.FAD2.b | (1028) | GATGGAACGCCGGCGGTTAAGGCGATGTGGAGGGAGGCGAAGGAGTGTATCTATG   |      |      |      |      |      |

Supplemental Figure 1. BnaFAD2 sequence alignment

---

|                        | (1101) | 1101      | 1110       | 1120         | 1130     | 1140             | 1155 | Section 21 |
|------------------------|--------|-----------|------------|--------------|----------|------------------|------|------------|
| Tap_BnaC.FAD2.a (1097) | T      | GGAACCGGA | CAGGCAAGGT | GAGAAGAAAGGT | TGTGTTCT | GGTACAACAATAAGTT |      |            |
| Cab_BnaC.FAD2.a (1097) | T      | GGAACCGGA | CAGGCAAGGT | GAGAAGAAAGGT | TGTGTTCT | GGTACAACAATAAGTT |      |            |
| Tap_BnaA.FAD2.a (1097) | T      | GGAACCGGA | CAGGCAAGGT | GAGAAGAAAGGT | TGTGTTCT | GGTACAACAATAAGTT |      |            |
| Cab_BnaA.FAD2.a (1096) | T      | GGAACCGGA | CAGGCAAGGT | GAGAAGAAAGGT | TGTGTTCT | GGTACAACAATAAGTT |      |            |
| Tap_BnaC.FAD2.b (1097) | T      | GAACCGGA  | TAGGCAAGGT | GAGAAGAAAGGT | TGTGTTCT | GGTACAACAATAAGTT |      |            |
| Tap_BnaA.FAD2.b (1083) | T      | GAACCGGA  | TAGGCAAGGT | GAGAAGAAAGGT | TGTGTTCT | GGTACAACAATAAGTT |      |            |
| Cab_BnaA.FAD2.b (1083) | T      | GAACCGGA  | TAGGCAAGGT | GAGAAGAAAGGT | TGTGTTCT | GGTACAACAATAAGTT |      |            |

---

|                        | (1156) | 1156 | 1159 | Section 22 |
|------------------------|--------|------|------|------------|
| Tap_BnaC.FAD2.a (1152) | ATGA   |      |      |            |
| Cab_BnaC.FAD2.a (1152) | ATGA   |      |      |            |
| Tap_BnaA.FAD2.a (1152) | ATGA   |      |      |            |
| Cab_BnaA.FAD2.a (1151) | ATGA   |      |      |            |
| Tap_BnaC.FAD2.b (1152) | ATGA   |      |      |            |
| Tap_BnaA.FAD2.b (1138) | ATGA   |      |      |            |
| Cab_BnaA.FAD2.b (1138) | ATGA   |      |      |            |

Supplemental Figure 2. BnaFAD2 amino acid alignment

|                 |       | Section 1     |              |                  |             |                  |                      |               |              |         |    |
|-----------------|-------|---------------|--------------|------------------|-------------|------------------|----------------------|---------------|--------------|---------|----|
|                 |       | (1)           | 1            | 10               | 20          | 30               | 40                   | 50            | 60           | 70      | 56 |
| Tap_BnaC.FAD2.a | (1)   | MGAGGRMQVSPPS | KKSE         | TDTI             | KRVPCETPPFT | VG               | ELKKAIPPHCFKRSIPRSFS | YL            |              |         |    |
| Cab_BnaC.FAD2.a | (1)   | MGAGGRMQVSPPS | KKSE         | TDTI             | KRVPCETPPFT | VG               | ELKKAIPPHCFKRSIPRSFS | YL            |              |         |    |
| Tap_BnaA.FAD2.a | (1)   | MGAGGRMQVSPPS | KKSE         | TDNI             | KRVPCETPPFT | VG               | ELKKAIPPHCFKRSIPRSFS | YL            |              |         |    |
| Cab_BnaA.FAD2.a | (1)   | MGAGGRMQVSPPS | KKSE         | TDNI             | KRVPCETPPFT | VG               | ELKKAIPPHCFKRSIPRSFS | YL            |              |         |    |
| Tap_BnaC.FAD2.b | (1)   | MGAGGRMQVSPPS | SSPE         | TKTL             | KRVPCETPPFT | LG               | DLKKAIPPHCFKRSIPRSFS | YL            |              |         |    |
| Tap_BnaA.FAD2.b | (1)   | MGAGGRMQVSPPS | SSPG         | TNTL             | KRVPCETPPFT | LG               | DLKKAIPPHCFKRSIPRSFS | SS            |              |         |    |
| Cab_BnaA.FAD2.b | (1)   | MGAGGRMQVSPPS | SSPG         | TNTL             | KRVPCETPPFT | LG               | DLKKAIPPHCFKRSIPRSFS | SS            |              |         |    |
|                 |       | Section 2     |              |                  |             |                  |                      |               |              |         |    |
|                 |       | (57)          | 57           | 70               | 80          | 90               | 100                  | 110           | 120          | 112     |    |
| Tap_BnaC.FAD2.a | (57)  | IWDIIIASC     | FYYVAT       | TYFPLLPHPL       | SYF         | AWPLYWACQGC      | VLTVGV               | VWVIAHECGH    | HAF          |         |    |
| Cab_BnaC.FAD2.a | (57)  | IWDIIIASC     | FYYVAT       | TYFPLLPHPL       | SYF         | AWPLYWACQGC      | VLTVGV               | VWVIAHECGH    | HAF          |         |    |
| Tap_BnaA.FAD2.a | (57)  | IWDIIIASC     | FYYVAT       | TYFPLLPHPL       | SYF         | AWPLYWACQGC      | VLTVGV               | VWVIAHECGH    | HAF          |         |    |
| Cab_BnaA.FAD2.a | (57)  | IWDIIIASC     | FYYVAT       | ITSLSSLT         | LSPTSP      | GLSTGPARA        | ASPASGSPT            | SAATTPSA      | T            |         |    |
| Tap_BnaC.FAD2.b | (57)  | LFDI          | LVSS         | SLYHLSTA         | YFPLLPHPL   | PYL              | AWPLYWACQGC          | VLTVGL        | LWVIAHECGH   | HAF     |    |
| Tap_BnaA.FAD2.b | (57)  | TSSSPRLL      | LPLPPLHS     | LL               | PSPLPRLT    | PLLGLPRLRP       | NGPL                 | LGHSPRV       | RPPRLQRPPV   |         |    |
| Cab_BnaA.FAD2.b | (57)  | TSSSPRLL      | LPLPPLHS     | LL               | PSPLPRLT    | PLLGLPRLRP       | NGPL                 | LGHSPRV       | RPPRLQRPPV   |         |    |
|                 |       | Section 3     |              |                  |             |                  |                      |               |              |         |    |
|                 |       | (113)         | 113          | 120              | 130         | 140              | 150                  | 160           | 170          | 168     |    |
| Tap_BnaC.FAD2.a | (113) | SDYQWLDD      | TVGLIFHSFL   | LVPYFSWKYSHRRHNS | TGSLER      | DEVFVPKKS        | SDIKWY               |               |              |         |    |
| Cab_BnaC.FAD2.a | (113) | SDYQWLDD      | TVGLIFHSFL   | LVPYFSWKYSHRRHNS | TGSLER      | DEVFVPKKS        | SDIKWY               |               |              |         |    |
| Tap_BnaA.FAD2.a | (113) | SDYQWLDD      | TVGLIFHSFL   | LVPYFSWKYSHRRHNS | TGSLER      | DEVFVPKKS        | SDIKWY               |               |              |         |    |
| Cab_BnaA.FAD2.a | (113) | TSGWTT        | PSASSSTPS    | SSLT             | TSPGS---    | TVIDATIP         | TLA                  | PSRETKCL      | SPRRS        | QTSSG   |    |
| Tap_BnaC.FAD2.b | (113) | SDH           | QWLDD        | AVGLV            | FHSFL       | LVPYFSWKYSHRRHNS | TGSLER               | DEVFVPKKS     | SDIKWY       |         |    |
| Tap_BnaA.FAD2.b | (113) | AGR           | RRRRLPL      | LPPRPV           | LL          | LEVHP-----       | RHNS                 | TGSLDR        | DEVFVPKKS    | SDIKWY  |    |
| Cab_BnaA.FAD2.b | (113) | AGR           | RRRRLPL      | LPPRPV           | LL          | LEVHP-----       | RHNS                 | TGSLDR        | DEVFVPKKS    | SDIKWY  |    |
|                 |       | Section 4     |              |                  |             |                  |                      |               |              |         |    |
|                 |       | (169)         | 169          | 180              | 190         | 200              | 210                  | 220           | 230          | 224     |    |
| Tap_BnaC.FAD2.a | (169) | GKYLNNP       | LGRIVMLTVQFT | LLGWPL           | YLAFNV      | SGRPY            | DG                   | GFACHFHPNAPI  | YNDRERL      |         |    |
| Cab_BnaC.FAD2.a | (169) | GKYLNNP       | LGRIVMLTVQFT | LLGWPL           | YLAFNV      | SGRPY            | DG                   | GFACHFHPNAPI  | YNDRERL      |         |    |
| Tap_BnaA.FAD2.a | (169) | GKYLNNP       | LGRIVMLTVQFT | LLGWPL           | YLAFNV      | SGRPY            | DG                   | GFACHFHPNAPI  | YNDRERL      |         |    |
| Cab_BnaA.FAD2.a | (166) | TASTSTT       | LWDAP-C-RFS  | SL               | SAGLCT-PST  | SRGDLT           | TAAS                 | LAISTPTLPSTTT | TVSV         | V       |    |
| Tap_BnaC.FAD2.b | (169) | GKYLNNP       | LGRIVMLTVQFT | LLGWPL           | YLAFNV      | SGRPY            | SD                   | GFACHFHPNAPI  | YNDRERL      |         |    |
| Tap_BnaA.FAD2.b | (163) | GKYLNNP       | LGRIVMLTVQF  | KL               | GWPL        | YLAFNV           | SGRPY                | SD            | GFACHFHPNAPI | YNDRERL |    |
| Cab_BnaA.FAD2.b | (163) | GKYLNNP       | LGRIVMLTVQF  | KL               | GWPL        | YLAFNV           | SGRPY                | SD            | GFACHFHPNAPI | YNDRERL |    |
|                 |       | Section 5     |              |                  |             |                  |                      |               |              |         |    |
|                 |       | (225)         | 225          | 230              | 240         | 250              | 260                  | 270           | 280          |         |    |
| Tap_BnaC.FAD2.a | (225) | QIYIS         | DAGILAVCYGL  | FRYAAA           | -----       | QGVAS            | MVCFY                | ---           | GVPLLI       | VNGFLV  |    |
| Cab_BnaC.FAD2.a | (225) | QIYIS         | DAGILAVCYGL  | FRYAAA           | -----       | QGVAS            | MVCFY                | ---           | GVPLLI       | VNGFLV  |    |
| Tap_BnaA.FAD2.a | (225) | QIYIS         | DAGILAVCYGL  | RYAAV            | -----       | QGVAS            | MVCFY                | ---           | GVPLLI       | VNGFLV  |    |
| Cab_BnaA.FAD2.a | (219) | SRYTS         | PPTLAS       | SPSATV           | STATLLS     | SKELP            | RWSAS                | TEFL          | LSTGS        | -F-SLTC |    |
| Tap_BnaC.FAD2.b | (225) | QIYIS         | DAGVLSVCYGL  | RYAGS            | -----       | RGVAS            | MVCVY                | ---           | GVPLM        | IVNCFV  |    |
| Tap_BnaA.FAD2.b | (219) | QIYIS         | DAGVLSVCYGL  | RYAAS            | -----       | RGVAS            | VVCVY                | ---           | GVPLLI       | VNCFV   |    |
| Cab_BnaA.FAD2.b | (219) | QIYIS         | DAGVLSVC     | XXXXXXXXXX       | -----       | RGVAS            | VVCVY                | ---           | GVPLLI       | VNCFV   |    |

Supplemental Figure 2. BnaFAD2 amino acid alignment

|                 |       | Section 6 |     |     |     |     |     |     |     |     |     |    |   |   |   |   |   |   |   |   |   |   |   |   |   |   |   |   |   |   |   |   |   |   |   |   |   |   |   |   |   |   |   |   |   |   |   |   |   |   |   |   |   |   |   |
|-----------------|-------|-----------|-----|-----|-----|-----|-----|-----|-----|-----|-----|----|---|---|---|---|---|---|---|---|---|---|---|---|---|---|---|---|---|---|---|---|---|---|---|---|---|---|---|---|---|---|---|---|---|---|---|---|---|---|---|---|---|---|---|
|                 |       | (281)     | 281 | 290 | 300 | 310 | 320 | 330 | 340 | 350 | 336 |    |   |   |   |   |   |   |   |   |   |   |   |   |   |   |   |   |   |   |   |   |   |   |   |   |   |   |   |   |   |   |   |   |   |   |   |   |   |   |   |   |   |   |   |
| Tap_BnaC.FAD2.a | (273) | L         | Q   | H   | T   | H   | P   | S   | L   | P   | H   | Y  | D | S | S | E | W | D | L | R | G | A | L | T | V | D | R | D | Y | G | I | L | N | K | V | F | H | N | I | T | D | T | H | V | A | H | H | L | F | S | T | M | P | H | Y |
| Cab_BnaC.FAD2.a | (273) | L         | Q   | H   | T   | H   | P   | S   | L   | P   | H   | Y  | D | S | S | E | W | D | L | R | G | A | L | T | V | D | R | D | Y | G | I | L | N | K | V | F | H | N | I | T | D | T | H | V | A | H | H | L | F | S | T | M | P | H | Y |
| Tap_BnaA.FAD2.a | (273) | L         | Q   | H   | T   | H   | P   | S   | L   | P   | H   | Y  | D | S | S | E | W | D | L | R | G | A | L | T | V | D | R | D | Y | G | I | L | N | K | V | F | H | N | I | T | D | T | H | V | A | H | H | L | F | S | T | M | P | H | Y |
| Cab_BnaA.FAD2.a | (273) | L         | T   | M   | T   | R   | L   | S   | G   | I   | G   | -- | G | E | L | W | P | P | L | T | E | T | E | S | - | T | R | S | S | T | I | S | R | T | R | T | W | R | I | T | C | S | R | P | C | R | I | T | M | R | W | K | L | R | R |
| Tap_BnaC.FAD2.b | (273) | L         | Q   | H   | T   | H   | P   | S   | L   | P   | H   | Y  | D | S | S | E | W | D | L | R | G | A | L | T | V | D | R | D | Y | G | I | L | N | K | V | F | H | N | I | T | D | T | H | V | A | H | H | L | F | S | T | M | P | H | Y |
| Tap_BnaA.FAD2.b | (267) | L         | Q   | H   | T   | H   | P   | S   | L   | P   | H   | Y  | D | S | S | E | W | D | L | R | G | A | L | T | V | D | R | D | Y | G | I | L | N | K | V | F | H | N | I | T | D | T | H | V | A | H | H | L | F | S | T | M | P | H | Y |
| Cab_BnaA.FAD2.b | (267) | L         | Q   | H   | T   | X   | X   | X   | L   | P   | H   | Y  | D | S | S | E | W | D | L | R | G | A | L | T | V | D | R | D | Y | G | I | L | N | K | V | F | H | N | I | T | D | T | H | V | A | H | H | L | F | S | T | M | P | H | Y |

  

|                 |       | Section 7 |     |     |     |     |     |     |     |   |   |   |   |   |   |   |   |   |   |    |    |   |   |   |   |    |    |   |   |   |   |   |   |   |   |   |   |   |   |   |   |   |   |    |   |   |   |   |   |   |   |   |    |   |    |   |
|-----------------|-------|-----------|-----|-----|-----|-----|-----|-----|-----|---|---|---|---|---|---|---|---|---|---|----|----|---|---|---|---|----|----|---|---|---|---|---|---|---|---|---|---|---|---|---|---|---|---|----|---|---|---|---|---|---|---|---|----|---|----|---|
|                 |       | (337)     | 337 | 350 | 360 | 370 | 380 | 390 | 392 |   |   |   |   |   |   |   |   |   |   |    |    |   |   |   |   |    |    |   |   |   |   |   |   |   |   |   |   |   |   |   |   |   |   |    |   |   |   |   |   |   |   |   |    |   |    |   |
| Tap_BnaC.FAD2.a | (329) | H         | A   | M   | E   | A   | T   | K   | A   | I | K | P | I | L | G | E | Y | Y | Q | F  | D  | G | T | P | V | V  | K  | A | M | W | R | E | A | K | E | C | I | Y | V | E | P | D | R | -- | Q | G | E | K | K | G | V | F | W  | Y | N  | N |
| Cab_BnaC.FAD2.a | (329) | H         | A   | M   | E   | A   | T   | K   | A   | I | K | P | I | L | G | E | Y | Y | Q | F  | D  | G | T | P | V | V  | K  | A | M | W | R | E | A | K | E | C | I | Y | V | E | P | D | R | -- | Q | G | E | K | K | G | V | F | W  | Y | N  | N |
| Tap_BnaA.FAD2.a | (329) | H         | A   | M   | E   | A   | T   | K   | A   | I | K | P | I | L | G | E | Y | Y | Q | F  | D  | G | T | P | V | V  | K  | A | M | W | R | E | A | K | E | C | I | Y | V | E | P | D | R | -- | Q | G | E | K | K | G | V | F | W  | Y | N  | N |
| Cab_BnaA.FAD2.a | (326) | R         | --  | S   | R   | Y   | W   | E   | S   | I | S | S | M | G | R | R | W | L | R | -- | -- | R | C | G | G | -- | -- | R | R | S | V | S | M | W | N | R | T | G | K | V | R | R | K | V  | C | S | G | T | T | I | S | Y | -- |   |    |   |
| Tap_BnaC.FAD2.b | (329) | N         | A   | M   | E   | A   | T   | K   | A   | I | K | P | I | L | G | E | Y | Y | Q | F  | D  | G | T | P | V | V  | K  | A | M | W | R | E | A | K | E | C | I | Y | V | E | P | D | R | -- | Q | G | E | K | K | G | V | F | W  | Y | N  | N |
| Tap_BnaA.FAD2.b | (323) | N         | A   | M   | E   | A   | T   | K   | A   | I | K | P | I | L | W | R | V | L | P | V  | -- | W | N | A | G | G  | -  | G | D | V | E | G | E | G | V | Y | L | C | - | T | G | - | A | R  | - | E | E | R | C | V | L | V | Q  | Q | -- |   |
| Cab_BnaA.FAD2.b | (323) | N         | A   | M   | E   | A   | T   | K   | A   | I | K | P | I | L | W | R | V | L | P | V  | -- | W | N | A | G | G  | -  | G | D | V | E | G | E | G | V | Y | L | C | - | T | G | - | A | R  | - | E | E | R | C | V | L | V | Q  | Q | -- |   |

  

|                 |       | Section 8 |     |  |  |  |  |  |  |  |  |
|-----------------|-------|-----------|-----|--|--|--|--|--|--|--|--|
|                 |       | (393)     | 393 |  |  |  |  |  |  |  |  |
| Tap_BnaC.FAD2.a | (383) | K         | L   |  |  |  |  |  |  |  |  |
| Cab_BnaC.FAD2.a | (383) | K         | L   |  |  |  |  |  |  |  |  |
| Tap_BnaA.FAD2.a | (383) | K         | L   |  |  |  |  |  |  |  |  |
| Cab_BnaA.FAD2.a | (374) | --        | --  |  |  |  |  |  |  |  |  |
| Tap_BnaC.FAD2.b | (383) | K         | L   |  |  |  |  |  |  |  |  |
| Tap_BnaA.FAD2.b | (372) | V         | M   |  |  |  |  |  |  |  |  |
| Cab_BnaA.FAD2.b | (372) | V         | M   |  |  |  |  |  |  |  |  |

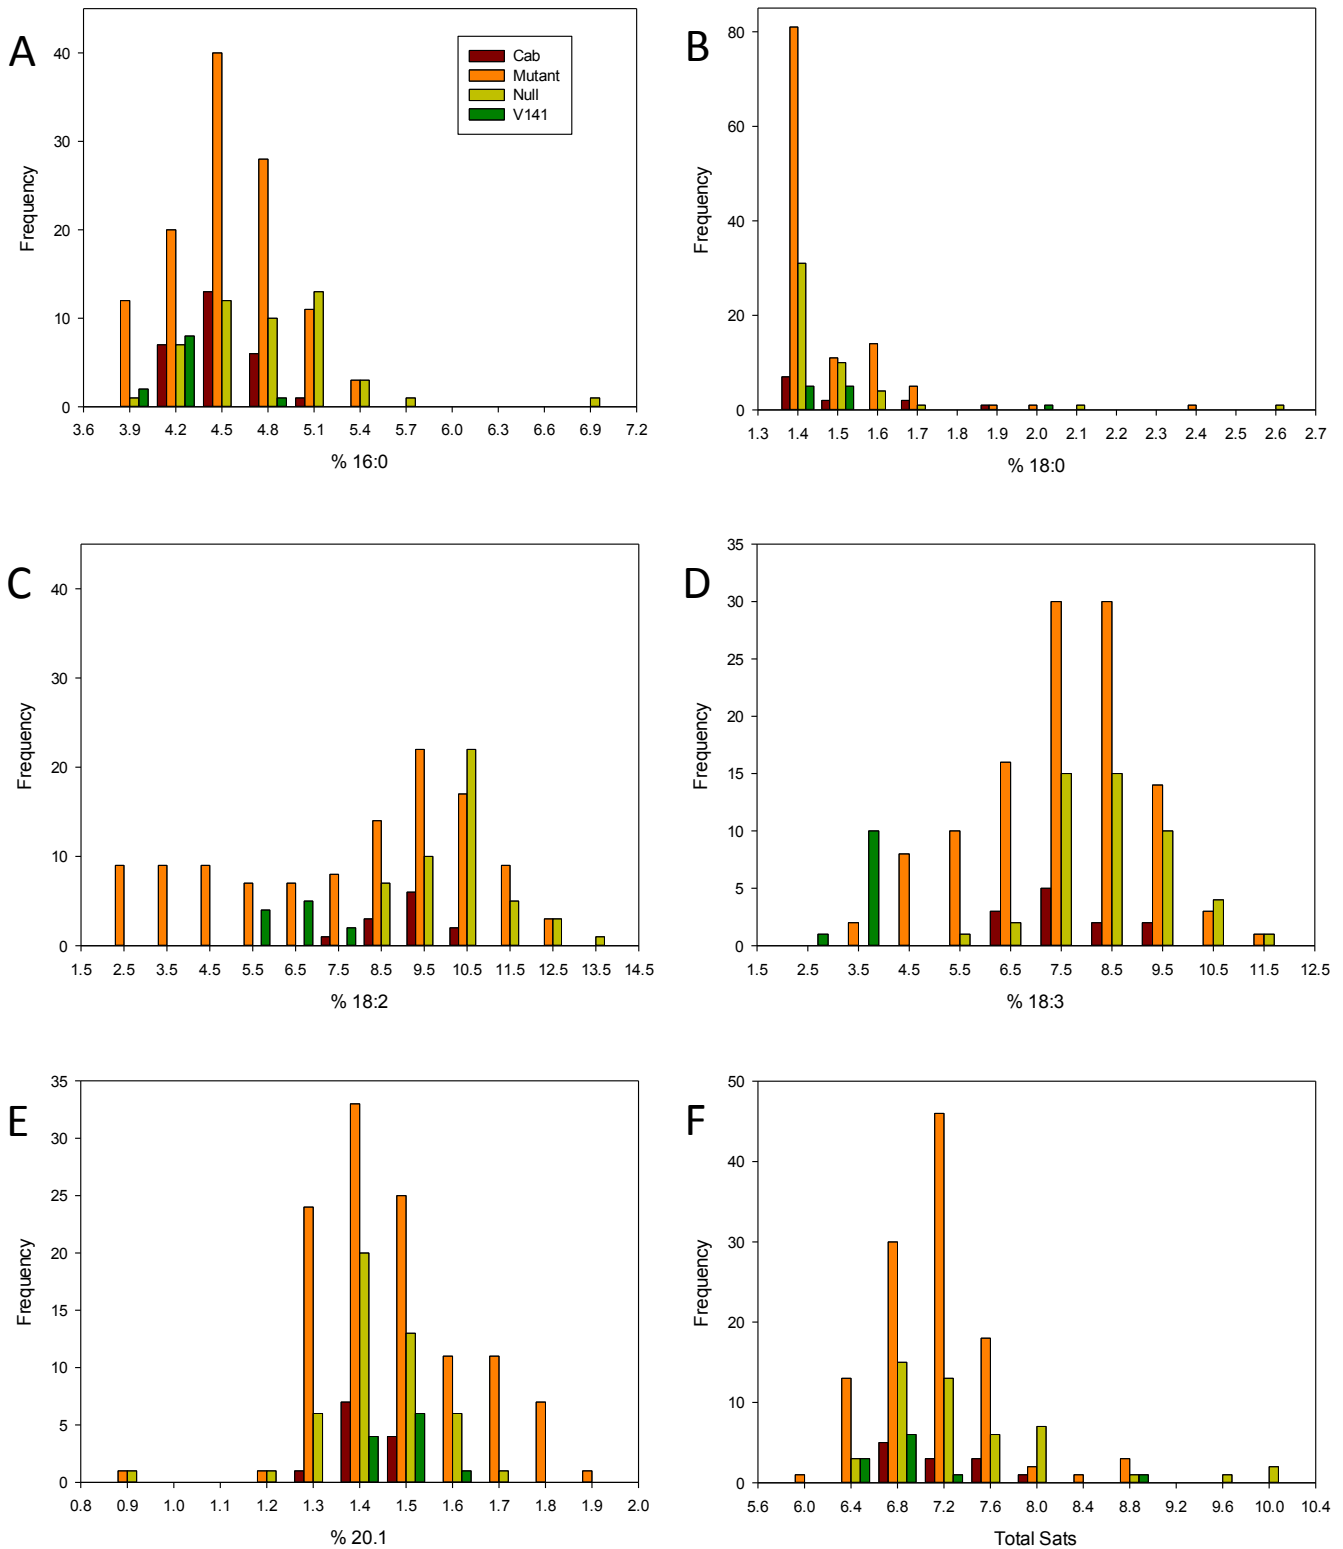

Supplemental Figure 3. Distribution of fatty acid composition of seeds in mutant and control lines. A) Palmitic acid (C16:0), B) Stearic acid (C18:0), C) Linoleic acid (C18:2), D) Linolenic acid (C18:3), E) 9-Eicosenoic acid (C20:1) and F) total saturated fatty acids in seeds of *B. napus* variety Cabriolet (Cab), *BnaA.FAD2.a* mutated lines (Mutant), outsegregant lines (Null) and a commercial high oleic, low linolenic line (V141).

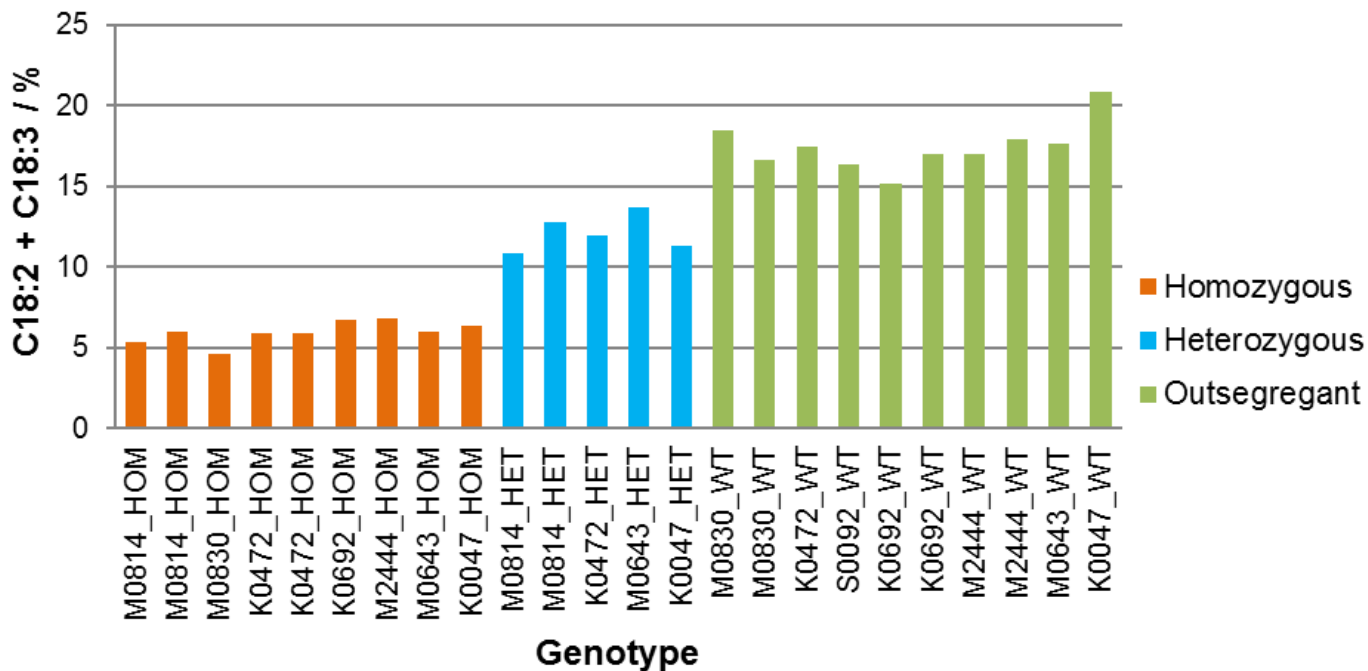

Supplemental Figure 4. Polyunsaturated fatty acid content of seeds from plants segregating for mutations in *BnaC.FAD2.a* that have major effects on oil composition
